# Supplementary material for: A label-free immunosensor based on PHEMA/graphene oxide nanocomposite for simultaneous electrochemical determination of alpha fetoprotein
Source: Royal Society of Chemistry journal article supplement (doi:10.1039/c9ra02565k), 2019-01-01
Supplement: c9ra02565k1.pdf [file c9ra02565k1.pdf]

**A Label-Free Immunosensor Based on PHEMA/Graphene Oxide Nanocomposite  
for Simultaneous Electrochemical Determination of Alpha Fetoprotein**

Ying Liang, Xiaoqing Zhao, Na Wang, Jing Wang, Hui Xu, Hou Chen\*, Liangjiu  
Bai\*, Wenxiang Wang

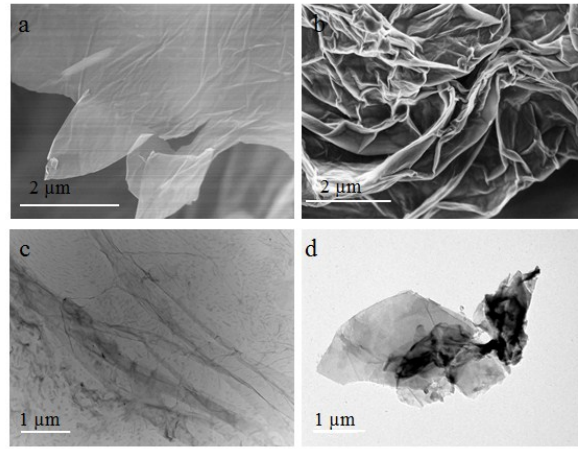

**Fig. S1.** The SEM images (a) GO, (b) PHEMA/GO; the TEM images of (c) GO, (d) PHEMA/GO.

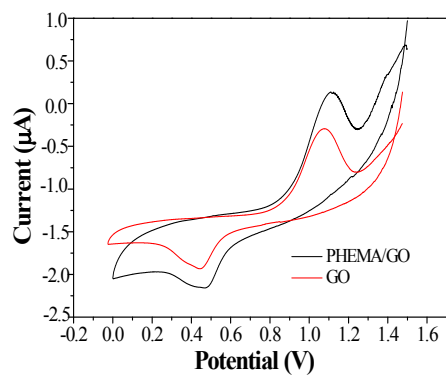

**Fig. S2.** The immune response of PHEMA/GO nanocomposite and GO was compared using CV characterizations.
